# Supplementary material for: Efficient Removal of Chromium(VI) Using a Novel Waste Biomass Chestnut Shell-Based Carbon Electrode by Electrosorption
Source: PubMed Central journal article supplement — ACS Omega. 2021 Sep 21;6(39):25389–96. doi: 10.1021/acsomega.1c03337 (PMC8495849; doi:10.1021/acsomega.1c03337), 2021-09-21
Supplement: ao1c03337_si_001.pdf [file ao1c03337_si_001.pdf]

## Supporting Information

### Efficient removal of chromium(VI) using a novel waste biomass chestnut shell-based carbon electrode by electrosorption

Xiaofei Zhang<sup>a,†</sup>, Bo Ren<sup>b,†</sup>, Xiaonan Wu<sup>a,\*</sup>, Xin Yan<sup>a</sup>, Yu Sun<sup>a</sup>, Hongcheng Gao<sup>a</sup>, Feng Qu<sup>a</sup>

<sup>a</sup> Department of Chemical Engineering, Hebei Petroleum University of Technology, Chengde, 067000, PR China

<sup>b</sup> Institute for Interdisciplinary Biomass Functional Materials Studies, Jilin Engineering Normal University, Changchun, 130052, PR China

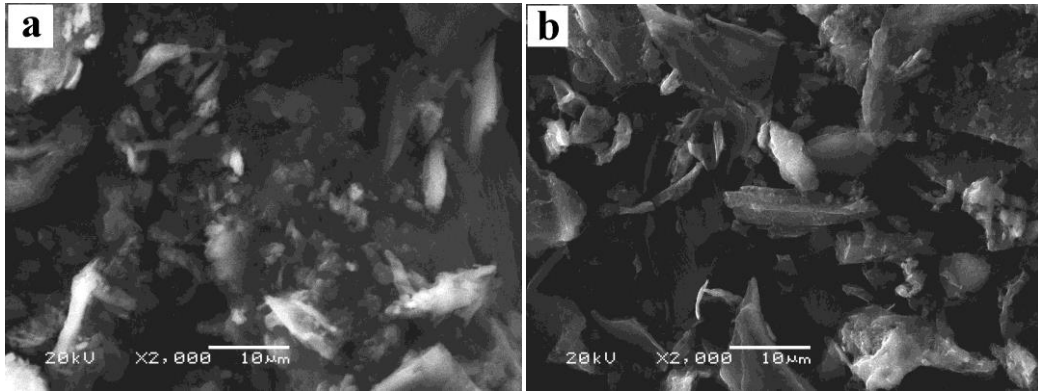

Figure S1. SEM images of the CHC (a) and DCHC (b).

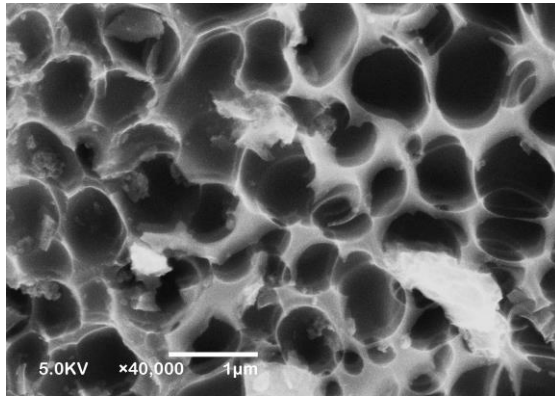

Figure S2. SEM image of the CPC.

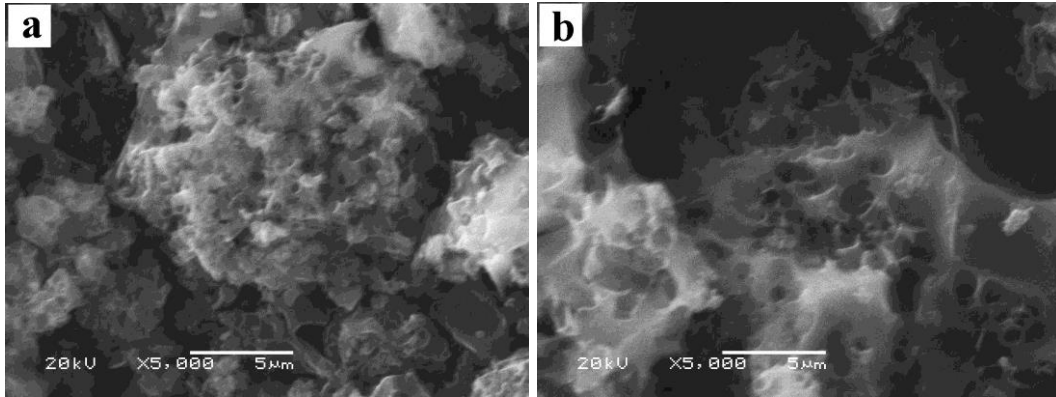

Figure S3. SEM images of the CPC-400 (a) and CPC-550 (b).

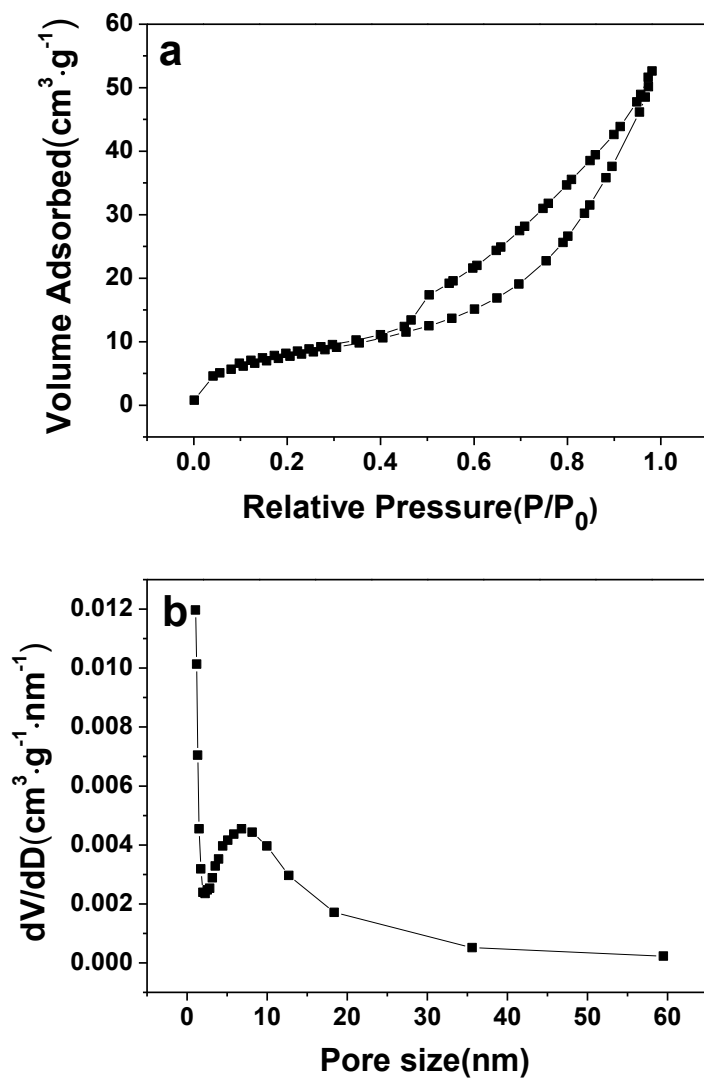

Figure S4.  $\text{N}_2$  adsorption-desorption isotherm (a) and pore size distribution (b) of CHC.

Table S1. Removal efficiency of different adsorbents for chromium(VI).

| Material                                                      | Voltage (V) | Initial concentration (mg L <sup>-1</sup> ) | Removal efficiency (%) | Ref.      |
|---------------------------------------------------------------|-------------|---------------------------------------------|------------------------|-----------|
| Acid treated rice husk waste biomass activated carbon         | 1.2         | 10                                          | 85                     | 56        |
|                                                               |             | 25                                          | 82                     |           |
|                                                               |             | 50                                          | 54                     |           |
|                                                               |             | 100                                         | 32                     |           |
| Stainless steel nets coated with single wall carbon nanotubes | 1.0         | 6.39                                        | 7.8                    | 57        |
|                                                               | 2.5         | 6.39                                        | 99.6                   |           |
| Activated carbon (commercial)                                 | 1.2         | 10                                          | 97.1                   | 55        |
|                                                               |             | 100                                         | 42                     |           |
| CPC                                                           | 1.0         | 30                                          | 90.5                   | This work |
